# Evaluation of the Role of *SNCA* Variants in Survival without Neurological Disease

Michael G. Heckman<sup>1\*</sup>, Alexandra I. Soto-Ortolaza<sup>2</sup>, Nancy N. Diehl<sup>1</sup>, Minerva M. Carrasquillo<sup>2</sup>, Ryan J. Uitti<sup>3</sup>, Zbigniew K. Wszolek<sup>3</sup>, Neill R. Graff-Radford<sup>3</sup>, Owen A. Ross<sup>2</sup>

<sup>1</sup> Biostatistics Unit, Mayo Clinic, Jacksonville, Florida, United States of America, <sup>2</sup> Department of Neuroscience, Mayo Clinic, Jacksonville, Florida, United States of America, <sup>3</sup> Department of Neurology, Mayo Clinic, Jacksonville, Florida, United States of America

## Abstract

**Background:** A variety of definitions of successful aging have been proposed, many of which relate to longevity, freedom from disease and disability, or preservation of high physical and cognitive function. Many behavioral, biomedical, and psychological factors have been linked with these various measures of successful aging, however genetic predictors are less understood. Parkinson's disease (PD) is an age-related neurodegenerative disorder, and variants in the  $\alpha$ -synuclein gene (*SNCA*) affect susceptibility to PD. This exploratory study examined whether *SNCA* variants may also promote successful aging as defined by survival without neurological disease.

**Methods:** We utilized 769 controls without neurological disease (Mean age: 79 years, Range: 33–99 years) and examined the frequency of 20 different *SNCA* variants across age groups using logistic regression models. We also included 426 PD cases to assess the effect of these variants on PD risk.

**Results:** There was a significant decline in the proportion of carriers of the minor allele of rs10014396 as age increased ( $P=0.021$ ), from 30% in controls younger than 60 to 14% in controls 90 years of age or older. Findings were similar for rs3775439, where the proportion of carriers of the minor allele declined from 32% in controls less than 60 years old to 19% in those 90 or older ( $P=0.025$ ). A number of *SNCA* variants, not including rs10014396 or rs3775439, were significantly associated with susceptibility to PD.

**Conclusions:** In addition to its documented roles in PD and  $\alpha$ -synucleinopathies, our results suggest that *SNCA* has a role in survival free of neurological disease. Acknowledging that our findings would not have withstood correction for multiple testing, validation in an independent series of aged neurologically normal controls is needed.

**Citation:** Heckman MG, Soto-Ortolaza AI, Diehl NN, Carrasquillo MM, Uitti RJ, et al. (2012) Evaluation of the Role of *SNCA* Variants in Survival without Neurological Disease. PLoS ONE 7(8): e42877. doi:10.1371/journal.pone.0042877

**Editor:** Mathias Toft, Oslo University Hospital, Norway

**Received:** March 19, 2012; **Accepted:** July 13, 2012; **Published:** August 13, 2012

**Copyright:** © 2012 Heckman et al. This is an open-access article distributed under the terms of the Creative Commons Attribution License, which permits unrestricted use, distribution, and reproduction in any medium, provided the original author and source are credited.

**Funding:** This work is funded, in part, by a research grant for the American Parkinson Disease Association, the Morris K. Udall Parkinson's Disease Research Center of Excellence (NINDS P50 #NS072187) and the family of Carl and Susan Bolch. The funders had no role in study design, data collection and analysis, decision to publish, or preparation of the manuscript.

**Competing Interests:** The authors have declared that no competing interests exist.

\* E-mail: heckman.michael@mayo.edu

## Introduction

Aging can be defined as a progressive, generalized impairment of function resulting in a loss of adaptive response to stress and an increasing risk of age-associated disease [1,2]. Within this definition lies the paradoxical idea that individuals can age in a healthy manner, so-called successful aging, which is a topic that has received increased attention as a result of the dramatic increase in human life expectancy that has been witnessed during the past century. While longevity is clearly a key part of aging in a healthy manner, it is equally clear that it is not the only component, and that other factors require consideration [3]. The concept of successful aging was introduced by Rowe and Kahn, distinguishing “usual aging” from “successful aging”, and referring to successful aging as freedom from disease and disability, preservation of high physical and cognitive function, and engagement in social and productive activities [4,5]. A number of other definitions of successful aging have been put forth, many

of which, in addition to longevity and disease, emphasize disability, physical, or cognitive functioning [6,7].

Many different attempts have been made to identify characteristics associated with the various measures of successful aging that have been proposed. The majority of these reports have investigated demographic, behavioral, biomedical, or psychological factors, and have identified predictors such as absence of arthritis, better activities of daily living, and not smoking, among many others [6,7]. However, fewer studies have examined genetic predictors. The identification of genetic factors related to specific aspects of successful aging has several potential benefits, for instance, shedding light on the underlying biological systems and processes involved in aging successfully, and possibly allowing for the identification of people who possess harmful variants of those genes, for whom intervention could potentially increase the likelihood of successful aging.

Due to their links to specific aspects of successful aging such as disease, physical functioning, and cognitive functioning, the study

of age-related disorders offers promise in further understanding the mechanisms involved in the aging process. Parkinson's disease (PD) is one of the most prevalent age-related neurodegenerative disorders, with approximately 1.5% of the population older than sixty-five years being affected [8,9], and at the center of genetic PD research is the  $\alpha$ -synuclein gene (*SNCA*). Point mutations in *SNCA* were the first mutations identified in familial PD [10]. Subsequent studies showed  $\alpha$ -synuclein to be the major protein component of the pathologic inclusion observed in PD, the Lewy body [11,12]. Identification of genomic multiplication of the *SNCA* gene in familial PD demonstrated that over-expression could cause disease in a dose-dependent manner [13,14]. This observation fitted with the theory that common variation at the *SNCA* locus increased risk of sporadic PD via a pathomechanism of limited over-expression [15–19].

We speculated that variation in age-related disease genes such as *SNCA* may not only affect morbidity, but also influence particular aspects of successful aging. More specifically, in addition to its role in PD, we hypothesized that variation in *SNCA* may be associated with neurological disease in general and longevity. Therefore, the primary aim of this exploratory study was to evaluate the association between common *SNCA* single nucleotide polymorphisms (SNPs) and survival without neurological disease.

## Methods and Subjects

### Ethics statement

The Mayo Clinic institutional review board approved all work. All participants provided written informed consent.

### Subjects

In evaluating the role of common *SNCA* variants in successful aging as measured by survival without neurological disease, we utilized a series of 769 controls without neurological disease seen at Mayo Clinic Florida. Unrelated controls were deemed to be free of neurological disease by a neurologist, and did not have a family history of neurological disease. Mean age in the controls was  $79 \pm 11$  SD years (Range: 33–99 years), and 385 (50%) were male. All controls were white and of European ancestry. Controls were mostly unrelated spouses/caregivers of neurological patients, and a subset of these controls are included in our aging sibpair study [20]. Utilizing this group of controls, we evaluated the association of *SNCA* SNPs with age, where since the probability of living longer without neurological disease increases as age without neurological disease increases, age in these controls is a measure of survival without neurological disease.

We supplemented the healthy control series with 426 PD cases also seen at Mayo Clinic Florida, in order to examine associations of *SNCA* SNPs with PD [21]. Mean age of PD cases was  $72 \pm 11$  SD years (Range: 30–92 years), mean age at PD onset was  $62 \pm 12$  SD years (Range: 26–85 years), and 233 (55%) were male. All PD cases were white and of European ancestry, and were examined and observed longitudinally by a neurologist and diagnosed with PD according to published criteria [22]. There are no known related samples within or between the diagnosis groups. All subjects self-identified ethnicity.

### Genetic analysis

DNA was extracted from whole blood samples using standard protocols. Conserved regions (conservation score  $>200$ ) were identified across *SNCA* (coding regions  $\pm 10$  Kb) using the phastConst software embedded in UCSC Genome Browser (<http://genome.ucsc.edu>), based on the NCBI March 2006 assembly [23]. The conserved SNP approach was used to highlight

potentially functional variation and takes into account the high levels of linkage disequilibrium at the *SNCA* locus. We identified 20 SNPs with a minor allele frequency  $>1\%$  which were selected for analysis. The *SNCA* variants were genotyped on a Sequenom MassArray iPLEX platform (San Diego, CA; primer sequences are available on request) and analyzed with Typer 4.0 software. The rate of genotype calls was  $\geq 95\%$  for all SNPs.

### Statistical analysis

Deviations of SNP genotypes from Hardy Weinberg equilibrium (HWE) in controls were assessed using chi-square tests, while linkage disequilibrium (LD) between SNPs in controls was assessed using  $r^2$  values. In evaluation of the primary study aim, we used logistic regression models adjusted for gender to examine whether the proportion of carriers of the minor allele for each SNP varied across age in controls, where age was considered as a continuous variable. After examination of genotype frequencies in the overall group of controls, we chose to consider each SNP under a dominant model (i.e. presence or absence of the minor allele) owing to the relatively small number of homozygotes of the minor allele for many of the *SNCA* SNPs. We also divided age into categories, and estimated the proportion of control carriers of the minor allele in each age category. When utilizing the overall case-control series, single SNP associations with PD were evaluated using logistic regression models adjusted for age and gender under a dominant model. Odds ratios (ORs) and 95% confidence intervals (CIs) were estimated. Owing to the fact that the primary analysis comparing the frequency of *SNCA* variants across age is exploratory in nature in that this has not been evaluated before, no adjustment for multiple testing was made, and p-values of 0.05 or less were considered as statistically significant. All statistical analyses were performed using R statistical software (version 2.11.9; R Foundation for Statistical Computing, Vienna, Austria).

## Results

There was no evidence of a departure from HWE for any of the SNPs (all  $P > 0.05$ ). LD between SNPs is summarized in Figure 1; there was moderate to strong LD between a number of *SNCA* SNPs, with many  $r^2$  values of 0.30 or greater.

For each *SNCA* SNP, the proportion of carriers of the minor allele in controls is displayed in Table 1 for seven different age categories:  $<60$  years, 60–69 years, 70–74 years, 75–79 years, 80–84 years, 85–89 years, and  $\geq 90$  years. These age categories were chosen with the goal of displaying trends in as detailed a manner as possible, while maximizing the number of controls in each category. As seen in Table 1, there was a significant decline in the proportion of carriers of the minor allele of rs10014396 as age increased ( $P = 0.021$ ), where 30% of controls younger than 60 were carriers, compared to 14% of those 90 years of age and older. Results were similar for rs3775439, which was in strong LD with rs10014396 ( $r^2 = 0.84$ ); the proportion of carriers of the minor allele decreased from 32% in controls younger than 60 to 19% in those 90 or older ( $P = 0.025$ ). For all remaining *SNCA* SNPs, the proportion of carriers of the minor allele did not noticeably increase or decrease as age increased in controls (all  $P \geq 0.19$ ).

In Table 2 we present single SNP associations with PD in the entire series of 426 PD cases and 769 controls. Of particular interest, rs10014396 and rs3775439, both of which were associated with survival without neurological disease in controls, were not associated with PD (ORs 0.92 & 0.95,  $P \geq 0.58$ ). Significant protective associations in relation to PD were observed for rs1372519 (OR: 0.76,  $P = 0.034$ ) and rs1372520 (OR: 0.76,  $P = 0.039$ ). For the remaining *SNCA* SNPs, a number of significant

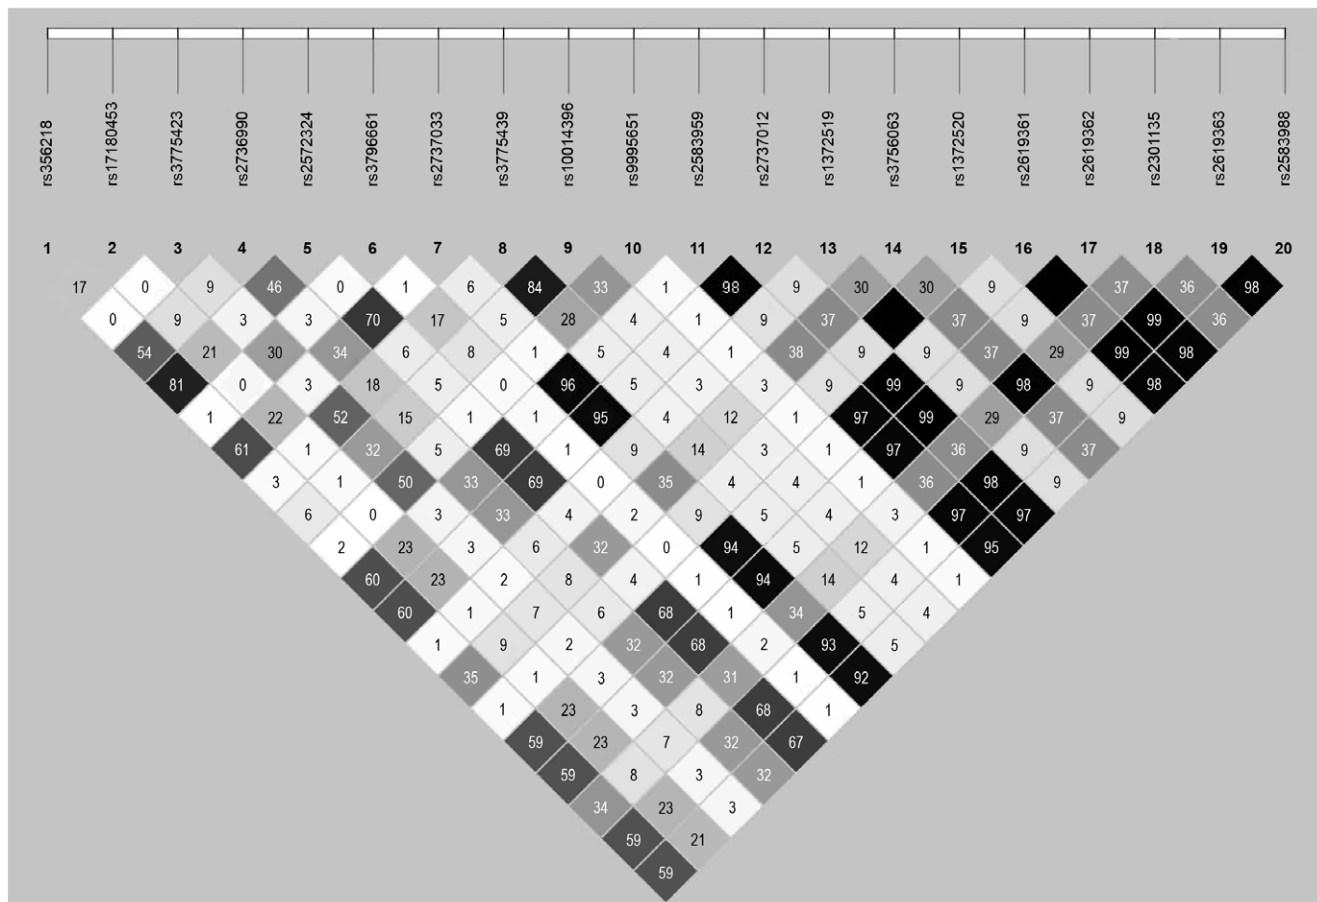

**Figure 1. Linkage disequilibrium between SNPs in controls as measured by pairwise  $r^2$  values.** Values are given as percentages out of a maximum of 100. Solid black boxes indicate an  $r^2$  value of 100.  
doi:10.1371/journal.pone.0042877.g001

risk associations with PD were observed, including rs356218, rs2736990, rs2572324, rs2737033, rs2583959, rs2737012, rs2619361, rs2619362, rs2619363, and rs2583988 (ORs between 1.39 and 1.64, all  $P \leq 0.026$ ), all of which were in moderate to strong LD (Figure 1).

## Discussion

Lifespan in humans has been shown to display markable heritability, with estimates ranging between 20% and 30%, confirming that longevity is to some extent determined by genetic mechanisms [24,25]. Identification of genetic variation influencing population mortality and specific aspects of successful aging may help characterize the overarching pathways and physiological processes that determine risk for common age-related diseases. Conversely, the study of age-related disease may provide greater insight into the molecular mechanisms that contribute to the aging process. In this exploratory study involving more than 750 controls free of neurological disease, our findings indicate that in addition to its known role in PD, *SNCA* may play a part in determining whether or not a given individual ages successfully as measured by the specific outcome of survival without neurological disease. More specifically, for two *SNCA* SNPs, rs10014396 and rs3775439, the minor allele was less common in older controls. The lower proportion of carriers of the minor allele for these two SNPs in the older controls suggests that unobserved individuals who are carriers of these alleles experience death or neurological disease

at an earlier age and are therefore removed from the pool of controls free of neurological disease at later ages, indicating that the presence of these alleles increases the risk of neurological disease or death. The two age-associated *SNCA* SNPs were not among those that were associated with PD when supplementing the controls with the PD cases in disease-association analysis; this may be due to the different outcome measure used which relates not only to PD but to death and neurological disease in general.

Similar to the results of our study, other studies have demonstrated associations between genes involved in neurodegenerative disorders and successful aging outcomes. As described by Glatt et al. in their review of 29 different studies evaluating at least one other characteristic of healthy aging in addition to longevity [26], *APOE*, the known risk factor for Alzheimer's disease, has been implicated in successful aging in several studies, however this association has not been consistently identified, and further study is therefore needed. Walter et al., in their genome-wide association study [27], identified evidence of association with survival free of major disease for *GRIN2B*, which has been implicated in Parkinson's disease [28] and Alzheimer's disease [29]. These findings, taken together with those from our study, suggest that the role of age-related neurodegenerative disease genes should be further studied in relation to healthy aging in general.

Although not of primary interest in this study, it is worth highlighting the significant associations of *SNCA* SNPs with PD that were observed in this study and previous studies [15–19,21]. Protective effects were observed for rs13752519 and rs1372520,

**Table 1.** Proportion of carriers of the minor allele according to age in controls free of neurological disease.

| Proportion of carriers of the minor allele in controls |            |              |                 |         |                   |         |                   |          |                   |         |                    |         |                    |         |                 |  |         |
|--------------------------------------------------------|------------|--------------|-----------------|---------|-------------------|---------|-------------------|----------|-------------------|---------|--------------------|---------|--------------------|---------|-----------------|--|---------|
| Chr4: (bp)*                                            | SNP        | Minor allele | Age: <60 (N=54) |         | Age: 60–69 (N=91) |         | Age: 70–74 (N=79) |          | Age: 75–79 (N=89) |         | Age: 80–84 (N=118) |         | Age: 85–89 (N=261) |         | Age: ≥90 (N=77) |  | P-value |
|                                                        |            |              | No. (%)         | No. (%) | No. (%)           | No. (%) | No. (%)           | No. (%)  | No. (%)           | No. (%) | No. (%)            | No. (%) | No. (%)            | No. (%) | No. (%)         |  |         |
| 90637010                                               | rs356218   | A            | 26 (48)         | 50 (55) | 45 (57)           | 50 (56) | 60 (51)           | 139 (53) | 45 (58)           | 0.53    |                    |         |                    |         |                 |  |         |
| 90653134                                               | rs17180453 | T            | 9 (17)          | 11 (12) | 11 (14)           | 20 (22) | 12 (10)           | 39 (15)  | 16 (21)           | 0.63    |                    |         |                    |         |                 |  |         |
| 90657491                                               | rs3775423  | T            | 8 (15)          | 17 (19) | 10 (13)           | 9 (10)  | 18 (15)           | 46 (18)  | 10 (13)           | 0.90    |                    |         |                    |         |                 |  |         |
| 90678541                                               | rs2736990  | G            | 39 (72)         | 70 (77) | 59 (75)           | 61 (69) | 78 (66)           | 182 (70) | 56 (73)           | 0.31    |                    |         |                    |         |                 |  |         |
| 90678798                                               | rs2572324  | G            | 24 (44)         | 43 (49) | 39 (49)           | 48 (54) | 58 (49)           | 125 (48) | 41 (53)           | 0.41    |                    |         |                    |         |                 |  |         |
| 90687507                                               | rs3796661  | T            | 4 (7)           | 7 (8)   | 1 (1)             | 5 (6)   | 7 (6)             | 14 (5)   | 4 (5)             | 0.59    |                    |         |                    |         |                 |  |         |
| 90707947                                               | rs2737033  | C            | 24 (44)         | 35 (38) | 36 (46)           | 45 (51) | 47 (40)           | 118 (45) | 40 (52)           | 0.27    |                    |         |                    |         |                 |  |         |
| 90709741                                               | rs3775439  | A            | 17 (32)         | 33 (36) | 23 (29)           | 20 (22) | 27 (23)           | 69 (26)  | 15 (19)           | 0.025   |                    |         |                    |         |                 |  |         |
| 90712629                                               | rs10014396 | C            | 16 (30)         | 30 (33) | 21 (27)           | 17 (19) | 23 (19)           | 63 (24)  | 11 (14)           | 0.021   |                    |         |                    |         |                 |  |         |
| 90716177                                               | rs9995651  | G            | 4 (7)           | 10 (11) | 8 (10)            | 3 (3)   | 10 (8)            | 29 (11)  | 5 (6)             | 0.98    |                    |         |                    |         |                 |  |         |
| 90721637                                               | rs2583959  | G            | 24 (44)         | 34 (37) | 35 (43)           | 44 (49) | 48 (41)           | 120 (46) | 40 (52)           | 0.21    |                    |         |                    |         |                 |  |         |
| 90745707                                               | rs2737012  | A            | 24 (44)         | 34 (37) | 35 (44)           | 43 (48) | 49 (42)           | 120 (46) | 40 (52)           | 0.21    |                    |         |                    |         |                 |  |         |
| 90757309                                               | rs1372519  | A            | 23 (43)         | 38 (42) | 29 (37)           | 36 (40) | 50 (42)           | 90 (34)  | 30 (39)           | 0.19    |                    |         |                    |         |                 |  |         |
| 90757394                                               | rs3756063  | G            | 39 (72)         | 62 (68) | 58 (73)           | 67 (75) | 89 (75)           | 185 (71) | 60 (78)           | 0.54    |                    |         |                    |         |                 |  |         |
| 90757505                                               | rs1372520  | T            | 22 (42)         | 38 (42) | 29 (37)           | 36 (40) | 50 (42)           | 90 (34)  | 30 (39)           | 0.22    |                    |         |                    |         |                 |  |         |
| 90757735                                               | rs2619361  | A            | 24 (44)         | 35 (38) | 35 (43)           | 44 (49) | 49 (42)           | 119 (46) | 40 (52)           | 0.26    |                    |         |                    |         |                 |  |         |
| 90757845                                               | rs2619362  | T            | 24 (44)         | 35 (38) | 35 (43)           | 44 (49) | 49 (42)           | 118 (45) | 40 (52)           | 0.27    |                    |         |                    |         |                 |  |         |
| 90758389                                               | rs2301135  | G            | 39 (74)         | 64 (71) | 60 (78)           | 66 (75) | 85 (72)           | 175 (67) | 57 (74)           | 0.79    |                    |         |                    |         |                 |  |         |
| 90759047                                               | rs2619363  | T            | 24 (44)         | 35 (38) | 34 (43)           | 44 (49) | 50 (42)           | 119 (46) | 40 (52)           | 0.24    |                    |         |                    |         |                 |  |         |
| 90760828                                               | rs2583988  | T            | 24 (44)         | 35 (38) | 34 (43)           | 44 (49) | 49 (42)           | 118 (45) | 40 (52)           | 0.26    |                    |         |                    |         |                 |  |         |

SNP = single nucleotide polymorphism. CI = confidence interval. \*Chromosomal positions based on the February 2009 (GRCH37/hg19) genome assembly [SNCA is located at Chr4:90,645,251–90,759,447]. P-values result from logistic regression models adjusted for gender, where the outcome was presence of the minor allele of the given SNP, and the predictor variable was age as a continuous variable. Genotype call rates for all SNPs were >95%. doi:10.1371/journal.pone.0042877.t001

**Table 2.** Single SNP associations with PD.

| Chr4: (bp)* | SNP        | Minor allele | Minor allele count and frequency |           | OR (95% CI)       | P-value |
|-------------|------------|--------------|----------------------------------|-----------|-------------------|---------|
|             |            |              | PD cases                         | Controls  |                   |         |
| 90637010    | rs356218   | A            | 335 (39%)                        | 505 (33%) | 1.49 (1.15, 1.92) | 0.002   |
| 90653134    | rs17180453 | T            | 83 (10%)                         | 124 (8%)  | 1.24 (0.89, 1.71) | 0.20    |
| 90657491    | rs3775423  | T            | 84 (10%)                         | 125 (8%)  | 1.31 (0.95, 1.82) | 0.10    |
| 90678541    | rs2736990  | G            | 459 (54%)                        | 724 (47%) | 1.39 (1.04, 1.85) | 0.026   |
| 90678798    | rs2572324  | G            | 303 (36%)                        | 447 (29%) | 1.42 (1.10, 1.82) | 0.006   |
| 90687507    | rs3796661  | T            | 29 (3%)                          | 44 (3%)   | 1.16 (0.69, 1.95) | 0.57    |
| 90707947    | rs2737033  | C            | 295 (35%)                        | 408 (27%) | 1.64 (1.28, 2.10) | <0.001  |
| 90709741    | rs3775439  | A            | 121 (14%)                        | 217 (14%) | 0.95 (0.72, 1.25) | 0.70    |
| 90712629    | rs10014396 | C            | 105 (12%)                        | 188 (12%) | 0.92 (0.69, 1.23) | 0.58    |
| 90716177    | rs9995651  | G            | 47 (6%)                          | 69 (4%)   | 1.30 (0.87, 1.96) | 0.21    |
| 90721637    | rs2583959  | G            | 288 (34%)                        | 401 (26%) | 1.62 (1.27, 2.08) | <0.001  |
| 90745707    | rs2737012  | A            | 287 (34%)                        | 399 (26%) | 1.62 (1.27, 2.08) | <0.001  |
| 90757309    | rs1372519  | A            | 155 (18%)                        | 339 (22%) | 0.76 (0.58, 0.98) | 0.034   |
| 90757394    | rs3756063  | G            | 442 (52%)                        | 738 (48%) | 1.30 (0.97, 1.74) | 0.075   |
| 90757505    | rs1372520  | T            | 155 (18%)                        | 338 (22%) | 0.76 (0.59, 0.99) | 0.039   |
| 90757735    | rs2619361  | A            | 287 (34%)                        | 400 (26%) | 1.61 (1.26, 2.06) | <0.001  |
| 90757845    | rs2619362  | T            | 94 (28%)                         | 66 (23%)  | 1.61 (1.26, 2.07) | <0.001  |
| 90758389    | rs2301135  | G            | 436 (53%)                        | 721 (49%) | 1.24 (0.92, 1.68) | 0.15    |
| 90759047    | rs2619363  | T            | 286 (34%)                        | 400 (26%) | 1.59 (1.24, 2.04) | <0.001  |
| 90760828    | rs2583988  | T            | 283 (33%)                        | 398 (26%) | 1.56 (1.22, 2.01) | <0.001  |

PD = Parkinson's disease. SNP = single nucleotide polymorphism. MA = minor allele. OR = odds ratio. CI = confidence interval. \*Chromosomal positions based on the February 2009 (GRCH37/hg19) genome assembly [SNCA is located at Chr4:90,645,251–90,759,447]. ORs, 95% CIs, and p-values result from logistic regression models adjusted for age and gender. ORs correspond to presence vs. absence of the minor allele.

doi:10.1371/journal.pone.0042877.t002

which were in strong LD, while risk effects were also noted for a number of other SNPs that were also in relatively high LD. In addition to their known role in PD, *SNCA* variants have also been implicated in both diffuse Lewy body disease [30] and multiple system atrophy [31,32,33]. The associations between *SNCA* variants and survival without neurological disease that were observed in this study provide additional support for all of these findings and also further underscore the pleiotropic nature of *SNCA*.

Several limitations are important to take into account in the interpretation of our results. There are other factors that are likely associated with survival free of neurological disease for which we did not collect information, and as such we cannot rule out the possibility that the associations of *SNCA* with survival free of neurological disease that we identified may be due in part to confounding factors. Also, owing to the exploratory nature of the study, we made no adjustment for multiple testing. The statistically significant decreasing frequencies of the minor allele for rs10014396 and rs3775439 as age increased in controls would not have remained significant after such an adjustment ( $P \leq 0.0058$  considered significant after permutation adjustment for multiple testing), and therefore it is important to highlight that our findings require validation in an independent series of healthy individuals. Related to this, our sample size of more than 700 controls free of

neurological disease is relatively small, and therefore the possibility of Type II error (i.e. a false negative association), particularly after adjustment for multiple testing, is important to consider. Larger series of healthy controls, in particular healthy nonagenarians and centenarians, are needed in future evaluation of *SNCA*'s role in the aging process. Finally, an important caveat of genetic aging studies is the possibility of population stratification given migration patterns and generational differences in lifestyle.

Acknowledging these limitations, our results indicate that in addition to its known role in PD and  $\alpha$ -synucleinopathies, *SNCA* may influence the likelihood of survival without neurological disease. Our findings, though requiring validation in an independent series, suggest that further study of the role of *SNCA* variation in aging and cognitive function is warranted.

## Acknowledgments

We would like to thank all those who have contributed to our research.

## Author Contributions

Conceived and designed the experiments: MMC RJU ZKW NRGR OAR. Performed the experiments: AISO OAR. Analyzed the data: MGH NND. Contributed reagents/materials/analysis tools: OAR ZKW NRGR. Wrote the paper: MGH OAR.

## References

- Harman D (1991) The aging process: major risk factor for disease and death. *Proc Natl Acad Sci U S A* 88: 5360–5363.
- Kirkwood TB (1996) Human senescence. *Bioessays* 18: 1009–1016.
- Karasik D, Demissie S, Cupples LA, Kiel DP (2005) Disentangling the genetic determinants of human aging: biological age as an alternative to the use of survival measures. *J Gerontol A Biol Sci Med Sci* 60: 574–587.

4. Rowe JW, Kahn RL (1987) Human aging: usual and successful. *Science* 237: 143–149.
5. Rowe JW, Kahn RL (1997) Successful aging. *Gerontologist* 37: 433–440.
6. Depp CA, Jeste DV (2006) Definitions and predictors of successful aging: a comprehensive review of larger quantitative studies. *Am J Geriatr Psychiatry* 14: 6–20.
7. Depp CA, Glatt SJ, Jeste DV (2007) Recent advances in research on successful or healthy aging. *Curr Psychiatry Rep* 9: 7–13.
8. de Lau LM, Breteler MM (2006) Epidemiology of Parkinson's disease. *Lancet Neurol* 5: 525–535.
9. Postuma RB, Montplaisir J (2009) Predicting Parkinson's disease - why, when, and how? *Parkinsonism Relat Disord* 15 Suppl 3: S105–109.
10. Polymeropoulos MH, Lavedan C, Leroy E, Ide SE, Dehejia A, et al. (1997) Mutation in the alpha-synuclein gene identified in families with Parkinson's disease. *Science* 276: 2045–2047.
11. Spillantini MG, Crowther RA, Jakes R, Hasegawa M, Goedert M (1998) alpha-Synuclein in filamentous inclusions of Lewy bodies from Parkinson's disease and dementia with lewy bodies. *Proc Natl Acad Sci U S A* 95: 6469–6473.
12. Spillantini MG, Schmidt ML, Lee VM, Trojanowsky JQ, Jakes R, et al. (1997) Alpha-synuclein in Lewy bodies. *Nature* 388: 839–840.
13. Ross OA, Braithwaite AT, Skipper LM, Kachergus J, Hulihan MM, et al. (2008) Genomic investigation of alpha-synuclein multiplication and parkinsonism. *Ann Neurol* 63: 743–750.
14. Singleton AB, Farrer M, Johnson J, Singleton A, Hague S, et al. (2003) alpha-Synuclein locus triplication causes Parkinson's disease. *Science* 302: 841.
15. Ross OA, Gosal D, Stone JT, Lincoln SJ, Heckman MG, et al. (2007) Familial genes in sporadic disease: common variants of alpha-synuclein gene associate with Parkinson's disease. *Mech Aging Dev* 128: 378–382.
16. Dächsel JC, Lincoln SJ, Gonzalez J, Ross OA, Dickson DW, et al. (2007) The ups and downs of alpha-synuclein mRNA expression. *Mov Disord* 22: 293–295.
17. Elbaz A, Ross OA, Ioannidis JP, Soto-Ortolaza AI, Moisan F, et al. (2011) Independent and joint effects of the MAPT and SNCA genes in Parkinson disease. *Ann Neurol* 69: 778–792.
18. Mueller JC, Fuchs J, Hofer A, Zimprich A, Lichtner P, et al. (2005) Multiple regions of alpha-synuclein are associated with Parkinson's disease. *Ann Neurol* 57: 535–541.
19. Trotta L, Guella I, Soldà G, Sironi F, Tesi S, et al. (2012) SNCA and MAPT genes: Independent and joint effects in Parkinson disease in the Italian population. *Parkinsonism Relat Disord* 18: 257–262.
20. Graff-Radford NR, Ferman TJ, Lucas JA, Johnson HK, Parfitt FC, et al. (2006) A cost effective method of identifying and recruiting persons over 80 free of dementia or mild cognitive impairment. *Alzheimer Dis Assoc Disord* 20: 101–104.
21. Ross OA, Conneely KN, Wang T, Vilarino-Guell C, Soto-Ortolaza AI, et al. (2011) Genetic variants of  $\alpha$ -synuclein are not associated with essential tremor. *Mov Disord* 26: 2552–2556.
22. Gelb DJ, Oliver E, Gilman S (1999) Diagnostic criteria for Parkinson disease. *Arch Neurol* 56: 33–39.
23. Siepel A, Bejerano G, Pedersen JS, Hinrichs AS, Hou M, et al. (2005) Evolutionarily conserved elements in vertebrate, insect, worm, and yeast genomes. *Genome Res* 15: 1034–1050.
24. Christensen K, Johnson TE, Vaupel JW (2006) The quest for genetic determinants of human longevity: challenges and insights. *Nat Review Genet* 7: 436–448.
25. Ross OA (2006) Longevity: genetic lessons for the ages. *Ir J Med Sci* 175: 82.
26. Glatt SJ, Chayavichitsilp P, Depp C, Schork NJ, Jeste DV (2007) Successful aging: from phenotype to genotype. *Biol Psychiatry* 62: 282–293.
27. Walter S, Atzmon G, Demerath EW, Garcia ME, Kaplan RC, et al. (2011) A genome-wide association study of aging. *Neurobiol Aging* 32: 2109.e15–28.
28. Wu SL, Wang WF, Shyu HY, Ho YJ, Shieh JC, et al. (2010) Association analysis of GRIN1 and GRIN2B polymorphisms and Parkinson's disease in a hospital-based case-control study. *Neurosci Lett* 478: 61–65.
29. Stein JL, Hua X, Morra JH, Lee S, Hibar DP, et al. (2010) Genome-wide analysis reveals novel genes influencing temporal lobe structure with relevance to neurodegeneration in Alzheimer's disease. *Neuroimage* 51: 542–554.
30. Nishioka K, Wider C, Vilarino-Güell C, Soto-Ortolaza AI, Lincoln SJ, et al. (2010) Association of alpha-, beta-, and gamma-Synuclein with diffuse lewy body disease. *Arch Neurol* 67: 970–975.
31. Scholz SW, Houlden H, Schulte C, Sharma M, Li A, et al. (2009) SNCA variants are associated with increased risk for multiple system atrophy. *Ann Neurol* 65: 610–614.
32. Ross OA, Vilarino-Güell C, Wszolek ZK, Farrer MJ, Dickson DW (2010) Reply to: SNCA variants are associated with increased risk of multiple system atrophy. *Ann Neurol* 67: 414–415.
33. Al-Chalabi A, Dürr A, Wood NW, Parkinson MH, Camuzat A, et al. (2009) Genetic variants of the alpha-synuclein gene SNCA are associated with multiple system atrophy. *PLoS One* 4: e7114.
